# Supplementary material for: Early and Mid-Term Outcomes of Transcatheter Aortic Valve Implantation versus Surgical Aortic Valve Replacement: Updated Systematic Review and Meta-Analysis
Source: MDPI journal article supplement (doi:10.3390/jcdd10040157), 2023-04-05

## **Supplemental Material**

Intended for publication as an online data supplement

**Figure S1.** Longest follow-up available for all-cause mortality.

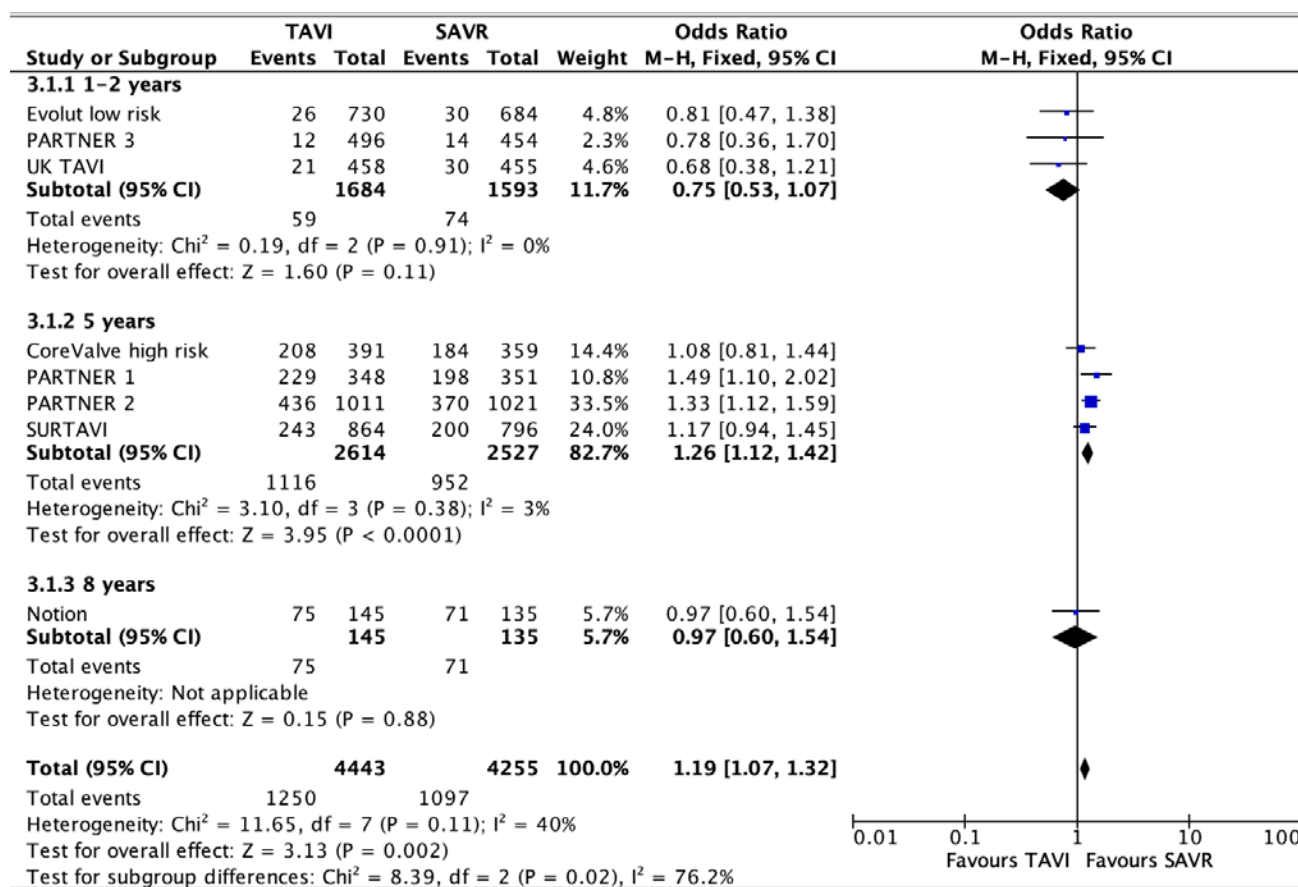

**Figure S2.** Meta regression analysis of all-cause mortality effect size and surgical risk (STS)

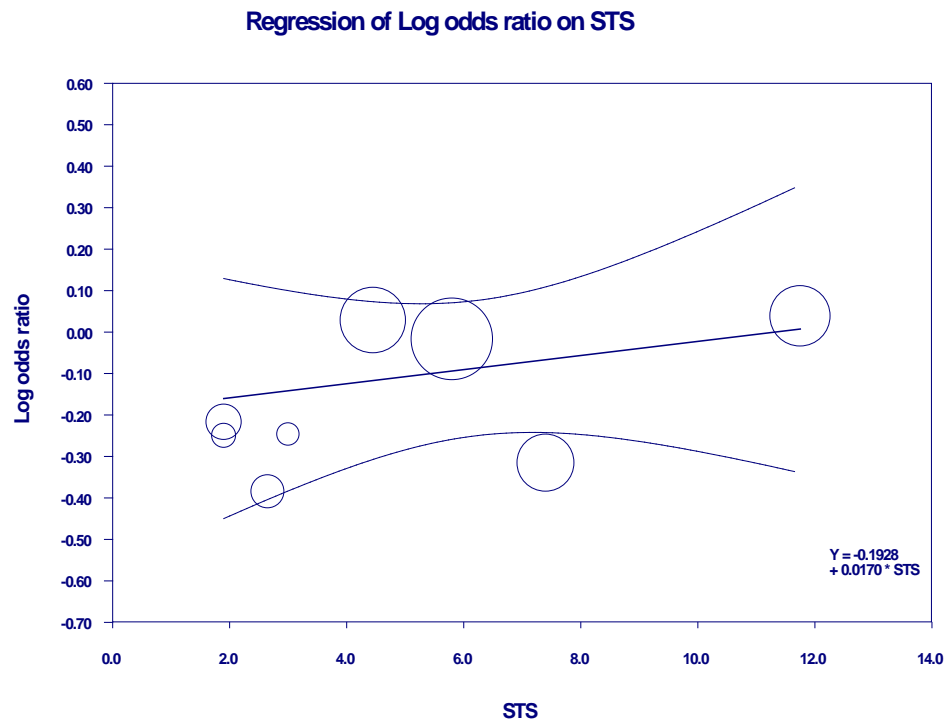

p=0.45

**Figure S3.** Funnel plot for all-cause mortality.

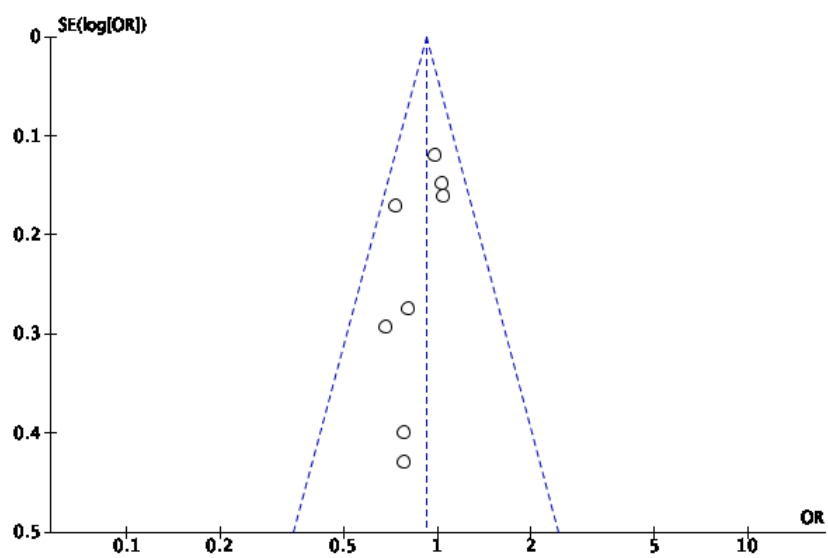

**Figure S4** Subgroup analysis for Permanent pacemaker implantation (A) and Acute kidney injury (B) according to TAVI valve system.

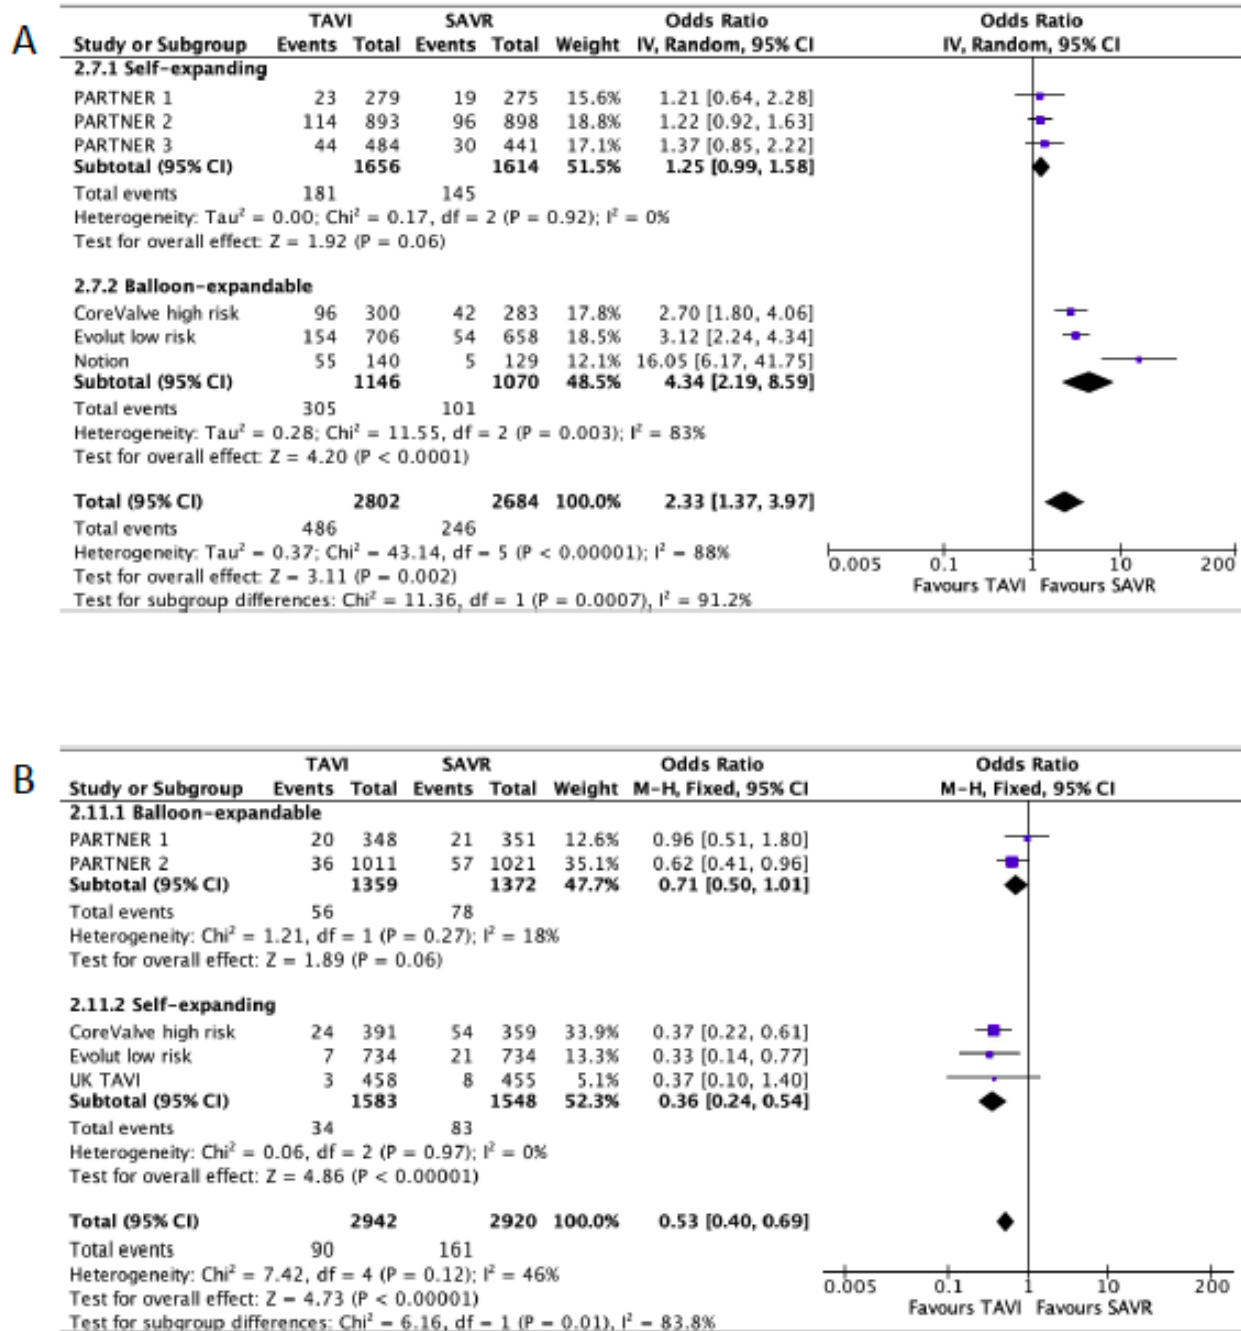

Supplement: s1 [file s1]
